# Supplementary material
Source: PubMed Central journal article supplement (PMC2799730)
Supplement: 0912673106_0912673106SI.pdf [file 0912673106_0912673106SI.pdf]

# Supporting Information

Vijayan et al. 10.1073/pnas.0912673106

## ST Text

Breakdown of Worksheets contained in [Dataset S1](#) is listed below.

**Worksheet 1: Analysis of Circadian Gene Exp.** Column A: Joint Genome Institute (JGI) ORF ID. Column B: 7942 ID. Columns C through F: Location of ORF on chromosome, pANL (large endogenous plasmid), or pANS (small endogenous plasmid) from the respective GenBank files CP000100, CP000101, and S89470. Columns G through I: Average GC content along coding region and promoter regions. Columns J through N:  $\text{Log}_2(\text{amplitude}/2)$ , phase, period, cluster, and classification (subjective dawn, subjective dusk, and noncircadian) of all

predicted ORFs. Column O: Temporal gene expression correlation between ORF and its clockwise neighbor. Column P: Temporal gene expression correlation between ORF and supercoiling waveform.

**Worksheet 2: KEGG Designations.** Columns A: Joint Genome Institute (JGI) ORF ID. Columns B: KEGG pathway designation. Columns C: ORF classification (subjective dawn, subjective dusk, and noncircadian).

**Worksheet 3: KEGG Pathway *p* values.** Columns A and J: KEGG pathway designation. Columns B through I: KEGG pathway statistics.



















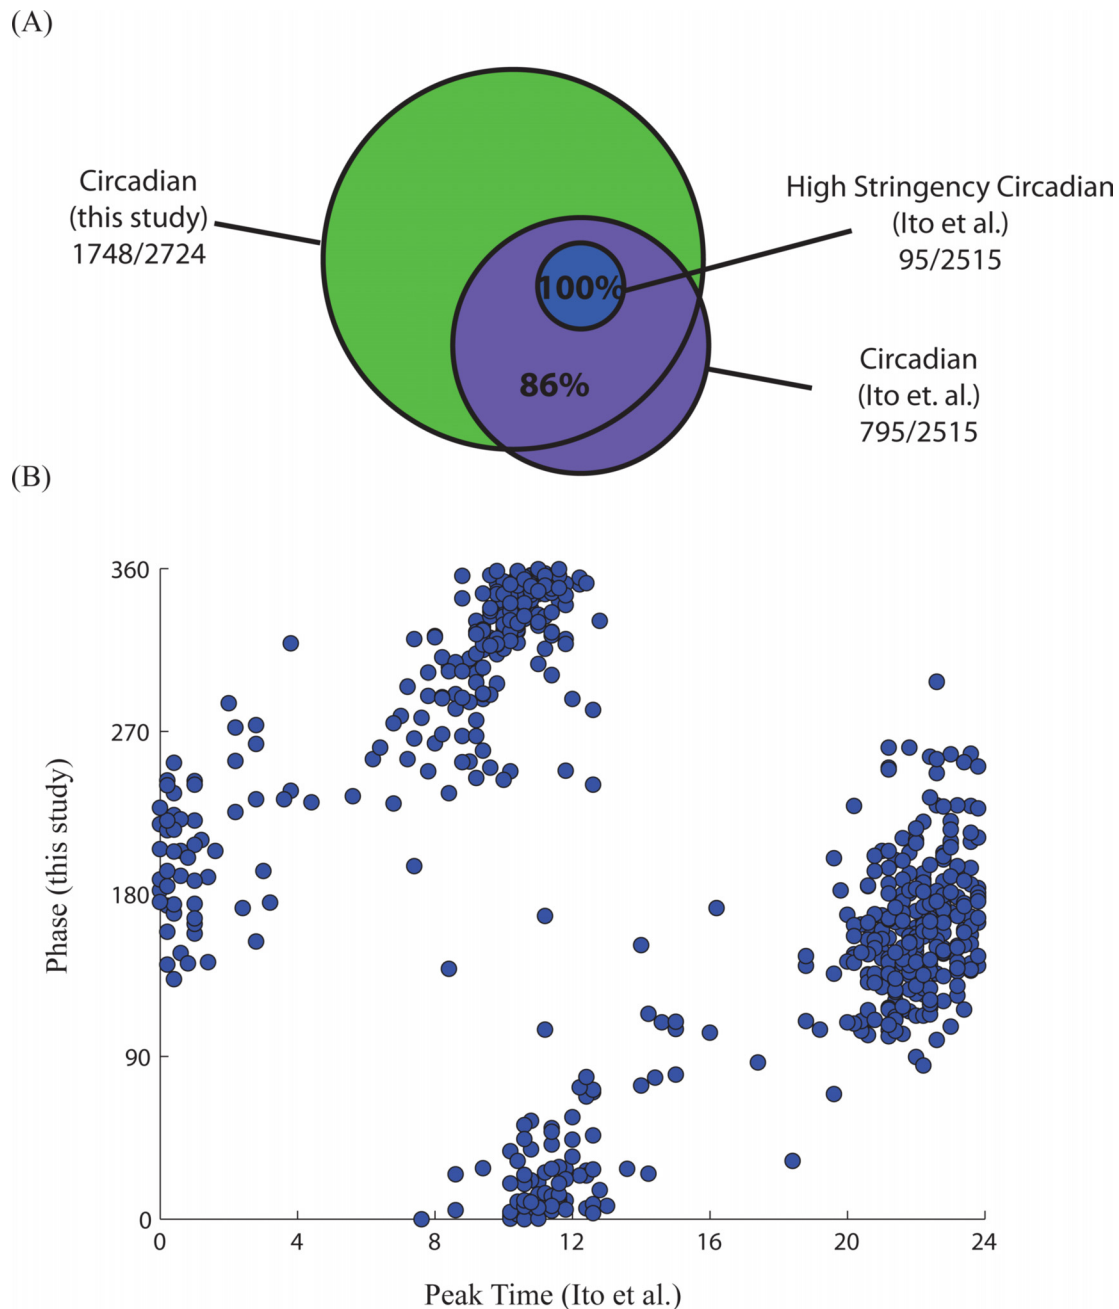

**Fig. S9.** Comparison of circadian gene expression to ref. 1. (A) Comparison of circadian genes found in this study vs. ref. 1. Eighty-six percent and 100% of the genes identified by ref. 1 as low and high stringency circadian genes, respectively, were classified as circadian in this study. Although most circadian genes identified in ref. 1 are identified in this study, we additionally identify 955 circadian genes. Some of these genes are predicted ORFs not present in the ref. 1 microarray experiments. Part of the remaining circadian genes identified in this study can be attributed to our identification criteria. Here, we do not filter genes with low amplitude and do not require expression profiles to necessarily be cosine-like. (B) Comparison of phase (this study) vs. peak time (ref. 1) in all genes identified as circadian in both studies. Genes oscillate with similar phase in both studies.

1. Ito H, et al. (2009) Cyanobacterial daily life with Kai-based circadian and diurnal genome-wide transcriptional control in *Synechococcus elongatus*. *Proc Natl Acad Sci USA* 106:14168–14173.

## Other Supporting Information Files

[Dataset S1 \(XLS\)](#)
